# Supplementary material for: Deep learning-based component identification for the Raman spectra of mixtures
Source: Royal Society of Chemistry journal article supplement (doi:10.1039/c8an02212g), 2019-01-01
Supplement: c8an02212g1.pdf [file c8an02212g1.pdf]

## Supplementary Information

### 1. Other classification methods for comparison

#### 1.1 Logistic Regression

Logistic Regression (LR) is a classical classification method and can also be seen as a simple neural network without hidden layers. LR fits the parameters from the training set, fitting the target to  $[0, 1]$ , and then discretizing the target to achieve classification. We used the 'LogisticRegression' module of the sklearn package in this study. SGD was used to learn weights of the model. The regularization penalty was 'l1', and the regularization parameters C was 1.00.

#### 1.2 k-Nearest Neighbor

k-Nearest Neighbor (kNN) is a simple and well-known classification method. It determines the class of a new sample by looking at the majority of the classes of the nearest k samples. The metrics we used for evaluating the distance between samples is the Euclidean distance. The number of neighbors  $k \in [2, 5]$  has been considered and 3 has been selected for our model.

#### 1.3 Random Forest

Random Forest (RF) is an ensemble learning method based on decision trees. It has the advantages of simplicity, ease of implementation, and low computational overhead, and powerful performance in many tasks. We use the 'RandomForestClassifier' module of the sklearn package in this study. The number of trees has been considered in the range  $[100, 500]$ , and the number of features randomly sampled for each split is optimized in the range  $[50, 200]$ . Finally, 500 trees and 90 features were selected.

#### 1.4 Back propagation artificial neural network

Artificial neural network is a complex network structure formed by a large number of neurons. It is a simplification and simulation of the structure and operation of the human brain. In this study, two types of ANN models were used for comparison with DeepCID. The first category, called BP-ANN, are Conventional Back Propagation neural networks. After optimized in range from 25 to 70, the number of nodes in BPs are determined to be 40, respectively. The initial bias is -0.5 to 0.5, and the batch size is 500. The Sigmoid was used as activation function and the Stochastic Gradient Descent was used as the Optimizer. The second category, FCNN models, were established by simply removing the convolutional layers of CNN models. They are used to further verify the effectiveness of the convolutional layers.

Table S1. Prediction accuracy of component identification models on simulated test set.

| NO. | Model for compound                 | Accuracy (%) |
|-----|------------------------------------|--------------|
| 1   | 1,4-Benzoquinone                   | 100.0        |
| 2   | 2-Propanol                         | 99.7         |
| 3   | 30% Hydrogen Peroxide              | 99.2         |
| 4   | 36% Acetic Acid                    | 99.7         |
| 5   | 4-Hydroxybenzoic Acid              | 100.0        |
| 6   | 4-Isobutylacetophenone             | 100.0        |
| 7   | $\alpha$ -Tocopherol               | 100.0        |
| 8   | $\alpha$ -Tocopheryl Acetate       | 99.9         |
| 9   | Acetacetic Ester                   | 100.0        |
| 10  | Acetaminophen                      | 100.0        |
| 11  | Acetanilide Melting Point Standard | 100.0        |
| 12  | Acetic Anhydride                   | 100.0        |
| 13  | Acetic Ether                       | 99.8         |
| 14  | Acetone                            | 99.8         |
| 15  | Acetonitrile                       | 99.6         |
| 16  | Adenosine                          | 100.0        |
| 17  | Albuterol Sulfate                  | 100.0        |
| 18  | Aniline                            | 100.0        |
| 19  | Ascorbic Acid                      | 100.0        |
| 20  | Avobenzene                         | 100.0        |
| 21  | Azithromycin                       | 100.0        |
| 22  | Benzoic Acid                       | 99.9         |
| 23  | Benzyl Alcohol                     | 99.7         |
| 24  | Bis(trimethylsilyl)amine           | 99.8         |
| 25  | Boric Acid                         | 100.0        |
| 26  | Bupivacaine HCl                    | 99.8         |
| 27  | Butanone                           | 100.0        |
| 28  | Butylparaben                       | 99.9         |
| 29  | Caffeine                           | 99.8         |
| 30  | Chloral Hydrate                    | 100.0        |
| 31  | Chlorpheniramine                   | 100.0        |
| 32  | Cimetidine HCl                     | 100.0        |
| 33  | Cimetidine                         | 100.0        |
| 34  | Ciprofloxacin HCl                  | 100.0        |
| 35  | Citric Acid                        | 100.0        |
| 36  | Citric Acid                        | 100.0        |
| 37  | Clarithromycin                     | 100.0        |
| 38  | Clindamycin Phosphate              | 100.0        |
| 39  | Clotrimazole                       | 100.0        |
| 40  | Cyclohexanone                      | 99.8         |

| NO. | Model for compound              | Accuracy (%) |
|-----|---------------------------------|--------------|
| 41  | Cyclosporine (Ciclosporin)      | 99.9         |
| 42  | Dextrose (D-Glucose)            | 100.0        |
| 43  | Dichloromethane                 | 99.7         |
| 44  | Diethylene Glycol               | 100.0        |
| 45  | Dimethyl Benzene                | 100.0        |
| 46  | Dimethyl Sulfoxide              | 99.5         |
| 47  | Diphenhydramine                 | 100.0        |
| 48  | Dopamine HCl                    | 100.0        |
| 49  | Edetate Disodium                | 99.9         |
| 50  | EDTA-2Na                        | 99.9         |
| 51  | Erythromycin                    | 100.0        |
| 52  | Ethanol                         | 99.5         |
| 53  | Ether                           | 99.5         |
| 54  | Ethylene Glycol                 | 99.9         |
| 55  | Ethylenediaminetetraacetic Acid | 99.8         |
| 56  | Ethylparaben                    | 100.0        |
| 57  | Famotidine                      | 100.0        |
| 58  | Formic acid                     | 99.6         |
| 59  | Fructose                        | 100.0        |
| 60  | Furosemide                      | 100.0        |
| 61  | Gabapentin                      | 100.0        |
| 62  | Glycerin                        | 99.8         |
| 63  | Glycerin                        | 99.9         |
| 64  | Glycine                         | 100.0        |
| 65  | Guaiacol                        | 100.0        |
| 66  | Guaifenesin                     | 100.0        |
| 67  | Homosalate                      | 100.0        |
| 68  | Hydrazine Hydrate               | 99.8         |
| 69  | Hydrochlorothiazide             | 100.0        |
| 70  | Hydrocortisone                  | 100.0        |
| 71  | Ibuprofen                       | 100.0        |
| 72  | Isopropyl Amine                 | 98.8         |
| 73  | Isopropyl Ether                 | 99.8         |
| 74  | L-Alanine                       | 99.9         |
| 75  | L-Arginine                      | 100.0        |
| 76  | L-Aspartic Acid                 | 100.0        |
| 77  | L-Cysteine HCl                  | 99.9         |
| 78  | L-Glutamic Acid                 | 99.9         |
| 79  | L-Glutamine                     | 100.0        |
| 80  | L-Histidine                     | 100.0        |
| 81  | L-Isoleucine                    | 100.0        |

| NO. | Model for compound                       | Accuracy (%) |
|-----|------------------------------------------|--------------|
| 82  | L-Leucine                                | 99.9         |
| 83  | L-Lysine Acetate                         | 100.0        |
| 84  | L-Lysine HCl                             | 99.9         |
| 85  | L-Phenylalanine                          | 99.9         |
| 86  | L-Serine                                 | 100.0        |
| 87  | L-Tyrosine                               | 99.8         |
| 88  | Lactic Acid                              | 99.5         |
| 89  | Lactose, Anhydrous                       | 99.7         |
| 90  | Lactose, Monohydrate                     | 100.0        |
| 91  | Lidocaine                                | 100.0        |
| 92  | Magnesium Sulphate                       | 99.9         |
| 93  | Mannitol                                 | 99.9         |
| 94  | Meslamine (Mesalazine)                   | 99.8         |
| 95  | Metformin HCl                            | 100.0        |
| 96  | Methanol                                 | 99.2         |
| 97  | Methyl Silicone                          | 99.5         |
| 98  | Methylparaben                            | 100.0        |
| 99  | Metoprolol                               | 100.0        |
| 100 | Metronidazole                            | 100.0        |
| 101 | N, N-Dimethyl Formamide                  | 99.9         |
| 102 | N-Acetyl-L-Cysteine                      | 100.0        |
| 103 | N-Methyl Pyrrolidone                     | 99.9         |
| 104 | Naproxen                                 | 100.0        |
| 105 | Niacinamide (Nicotinamine)               | 99.9         |
| 106 | Nitric Acid                              | 99.4         |
| 107 | Octinoxate                               | 100.0        |
| 108 | Octisalate                               | 100.0        |
| 109 | Octocrylene                              | 100.0        |
| 110 | Omeprazole                               | 100.0        |
| 111 | Oxybenzone                               | 99.9         |
| 112 | p-Toluenesulfonic Acid                   | 99.7         |
| 113 | Paraformaldehyde                         | 99.5         |
| 114 | Phenacetin Melting Point Standard        | 100.0        |
| 115 | Phenoxyethanol                           | 100.0        |
| 116 | Phenyl Salicylate Melting Point Standard | 100.0        |
| 117 | Phenylephrine HCl                        | 99.4         |
| 118 | Phenylethyl Alcohol                      | 99.8         |
| 119 | Phosphorus Pentoxide                     | 99.7         |
| 120 | Phthalic Anhydride                       | 100.0        |
| 121 | Phytonadione                             | 100.0        |
| 122 | Polyacrylamide                           | 99.7         |

| NO. | Model for compound                   | Accuracy (%) |
|-----|--------------------------------------|--------------|
| 123 | Polyethylene Glycol                  | 99.8         |
| 124 | Polyethylene Glycol                  | 99.6         |
| 125 | Polyvinylpyrrolidone                 | 99.9         |
| 126 | Potassium Bichromate                 | 99.7         |
| 127 | Potassium Gluconate                  | 99.9         |
| 128 | Potassium Pyrophosphate              | 99.9         |
| 129 | Prednisolone                         | 99.9         |
| 130 | Propylene Glycol                     | 99.9         |
| 131 | Propylparaben                        | 100.0        |
| 132 | Pyridoxine HCl                       | 99.9         |
| 133 | Ranitidine HCl                       | 100.0        |
| 134 | Salicylic Acid                       | 100.0        |
| 135 | Silica Gel for TLC                   | 99.4         |
| 136 | Sodium Acetate Trihydrate            | 99.9         |
| 137 | Sodium Bicarbonate                   | 99.8         |
| 138 | Sodium Bisulfite                     | 99.6         |
| 139 | Sodium Carbonate                     | 99.9         |
| 140 | Sodium Chlorate                      | 99.8         |
| 141 | Sodium Lactate                       | 100.0        |
| 142 | Sodium Metabisulfite                 | 99.7         |
| 143 | Sodium Phosphate                     | 99.2         |
| 144 | Sodium Sulfite                       | 100.0        |
| 145 | Sodium Tetraborate                   | 99.9         |
| 146 | Sorbitol                             | 99.9         |
| 147 | Sucrose                              | 100.0        |
| 148 | Sulfamethoxazole                     | 100.0        |
| 149 | Sulfanilamide Melting Point Standard | 99.9         |
| 150 | Sulfapyridine Melting Point Standard | 100.0        |
| 151 | Taurine                              | 100.0        |
| 152 | Tetracaine HCl                       | 100.0        |
| 153 | Tetracycline HCl                     | 99.6         |
| 154 | Tetrahydrofuran                      | 99.8         |
| 155 | Theophylline                         | 100.0        |
| 156 | Thiamine HCl                         | 99.9         |
| 157 | Titanium Dioxide                     | 99.4         |
| 158 | Trichloromethane                     | 100.0        |
| 159 | Trihydroxymethyl Aminomethane        | 100.0        |
| 160 | Trimethoprim                         | 100.0        |
| 161 | Trisodium Citrate                    | 99.7         |
| 162 | Trolamine                            | 99.6         |
| 163 | Valproic Acid                        | 100.0        |

| NO. | Model for compound              | Accuracy (%) |
|-----|---------------------------------|--------------|
| 164 | Vanillin Melting Point Standard | 99.9         |
| 165 | Vanillin                        | 99.9         |
| 166 | Verapamil HCl                   | 100.0        |
| 167 | Zinc Oxide                      | 99.8         |

Table S2. The prediction accuracy (ACC%) of the simulated test set by different methods (after pre-processed).

| Model            | DeepCID | RF   | LR   | kNN  | BP-ANN | FCNN |
|------------------|---------|------|------|------|--------|------|
| Methanol         | 100.0   | 99.5 | 99.8 | 88.0 | 99.7   | 99.9 |
| Ethanol          | 99.7    | 99.7 | 99.7 | 78.0 | 99.3   | 99.6 |
| Acetonitrile     | 99.6    | 99.3 | 99.8 | 78.1 | 99.0   | 99.8 |
| Polyacrylamide   | 99.7    | 99.5 | 99.8 | 78.8 | 99.2   | 99.7 |
| Sodium Acetate   | 100.0   | 99.6 | 99.9 | 76.8 | 99.3   | 99.8 |
| Sodium Carbonate | 99.9    | 99.5 | 99.8 | 80.9 | 99.6   | 99.8 |
